# Supplementary material for: Ovomucin and its hydrolysates differentially influenced colitis severity in Citrobacter rodentium-infected mice
Source: Royal Society of Chemistry journal article supplement (doi:10.1039/d4fo01813c), 2024-01-01
Supplement: d4fo01813c1.pdf [file d4fo01813c1.pdf]

## 1 **Supplementary data**

2

### 3 **Ovomucin and its hydrolysates differentially influenced colitis severity in *Citrobacter*** 4 ***rodentium*-infected mice**

5

6 Xiaoyu Bao<sup>1</sup>, Tingting Ju<sup>1,2</sup>, Stephanie Tollenaar<sup>1</sup>, Consolato Sergi<sup>3</sup>, Benjamin P. Willing<sup>1</sup>, and  
7 Jianping Wu<sup>1</sup>

8 1. *Department of Agricultural, Food and Nutritional Science, Faculty of Agricultural, Life*  
9 *and Environmental Sciences, University of Alberta, Edmonton, Alberta, Canada*

10 2. *Department of Animal Sciences, Purdue University, West Lafayette, IN, USA*

11 3. *Division of Anatomic Pathology, Children's Hospital of Eastern Ontario (CHEO),*  
12 *Ottawa, Ontario, Canada*

13

## 14 **Figure captions**

15 **Fig S1.** Expression levels of tight junction protein occludin and ZO-1 in mouse colon tissues  
16 at 7 dpi. Data are expressed as mean  $\pm$  SEM (n=8). Ctrl, untreated control group; OVM,  
17 ovomucin group; OP, ovomucin-protex 26L hydrolysate group; OPP, ovomucin-  
18 pepsin/pancreatin hydrolysate group.

19 **Fig S2.** Comparison of relative abundance of bacterial taxonomies before *C. rodentium*  
20 infection. \* $P < 0.05$ , \*\* $P < 0.01$ , # $P < 0.1$ , according to the Kruskal-Wallis test combined with  
21 Dunn's test.

22 **Fig S3.** Comparison of relative abundance of bacterial taxonomies at 7dpi. \* $P < 0.05$ , \*\* $P <$   
23  $0.01$ , # $P < 0.1$ , according to the Kruskal-Wallis test combined with Dunn's test.

24 **Fig S4.** Growth of *C. rodentium* in M9 minimal media supplemented with 2.5% of OP and  
25 OPP. (A) Optical density at 600nm of *C. rodentium* after 6 h culture in M9 media. (B) *C.*  
26 *rodentium* quantification after cultivation in M9 media for different time periods. Data are  
27 expressed as mean  $\pm$  SEM (n=3-4). Groups that do not share a letter are significantly different  
28 (one-way ANOVA and Tukey's test) ( $\alpha = 0.05$ ).

29 **Fig S5.** Effects of OP and OPP on CMT-93 cell viability. Cells grown on 96-well plates were  
30 treated with OP or OPP at concentrations ranging from 0.1% to 2.5% for 24 h before being  
31 incubated with the alamarBlue solution in dark for 4. Fluorescence densities were detected with  
32 the excitation and emission wavelengths being 560 nm and 590 nm, respectively. Data are  
33 indicated by mean  $\pm$  SEM.

34 **Fig S6.** *C. rodentium* adhesion to CMT-93 cells after 5 h incubation in DMEM supplemented  
35 with 2.5% of OP and OPP. Data are expressed as mean  $\pm$  SEM. Groups that do not share a  
36 letter are significantly different (Kruskal-Wallis test with Dunn's test) ( $\alpha = 0.05$ ).

37 **Table S1.** Primers for real-time PCR analysis

Fig. S1

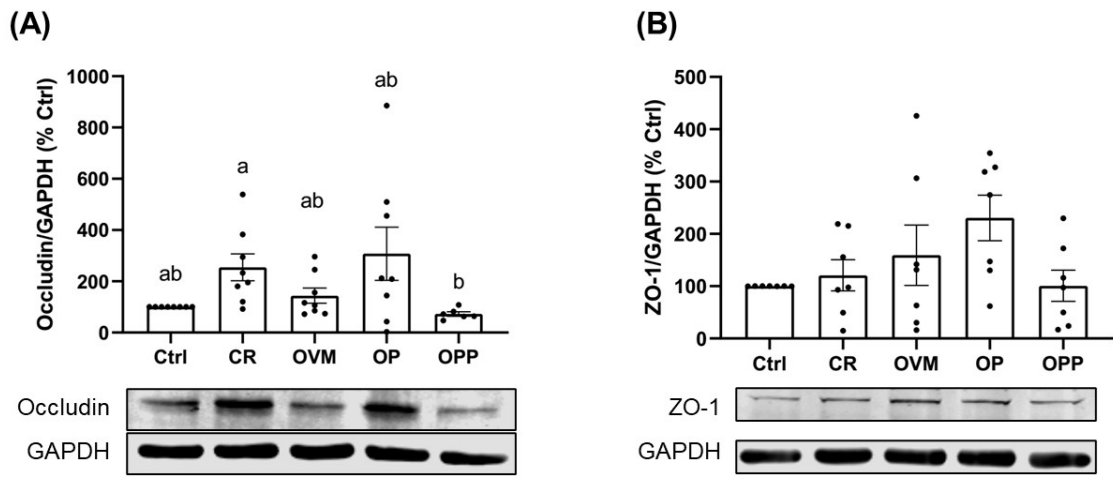

**Fig. S2**

**(A) Ctrl vs. OVM**

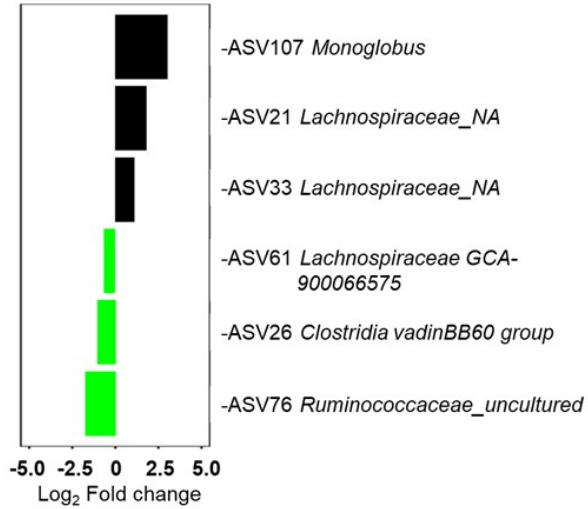

**(B) Ctrl vs. OP**

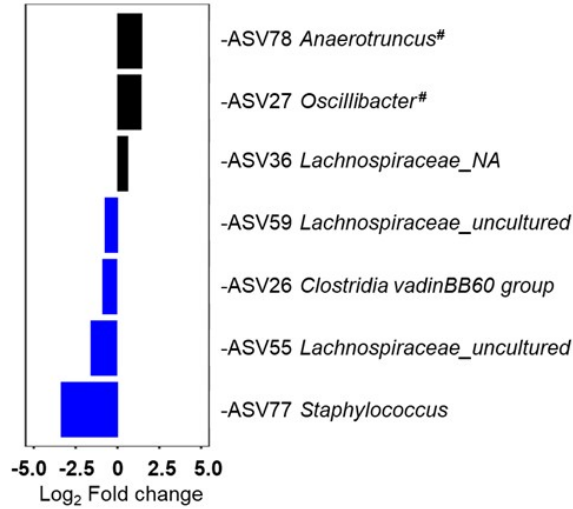

**(C) Ctrl vs. OPP**

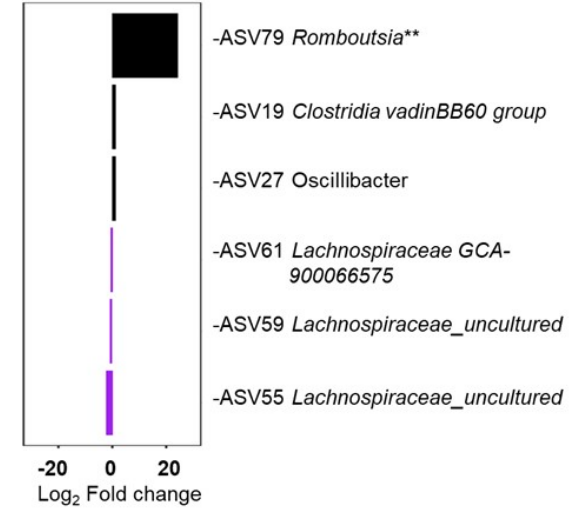

**(D) OVM vs. OP**

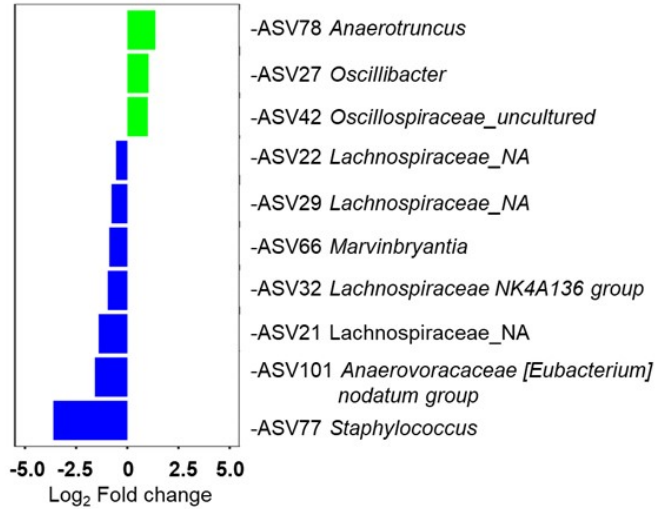

**(E) OVM vs. OPP**

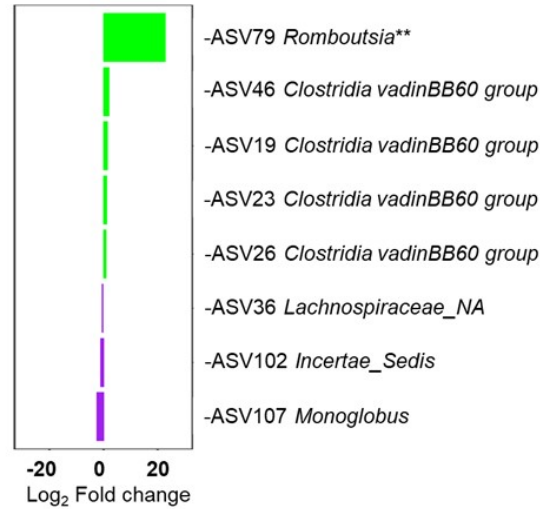

**(F) OP vs. OPP**

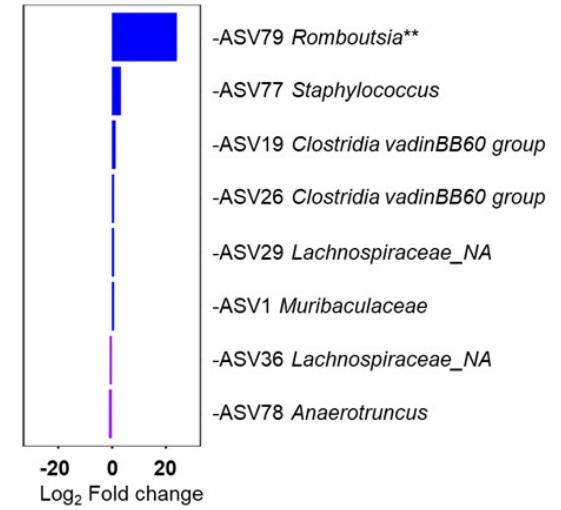

Fig. S3

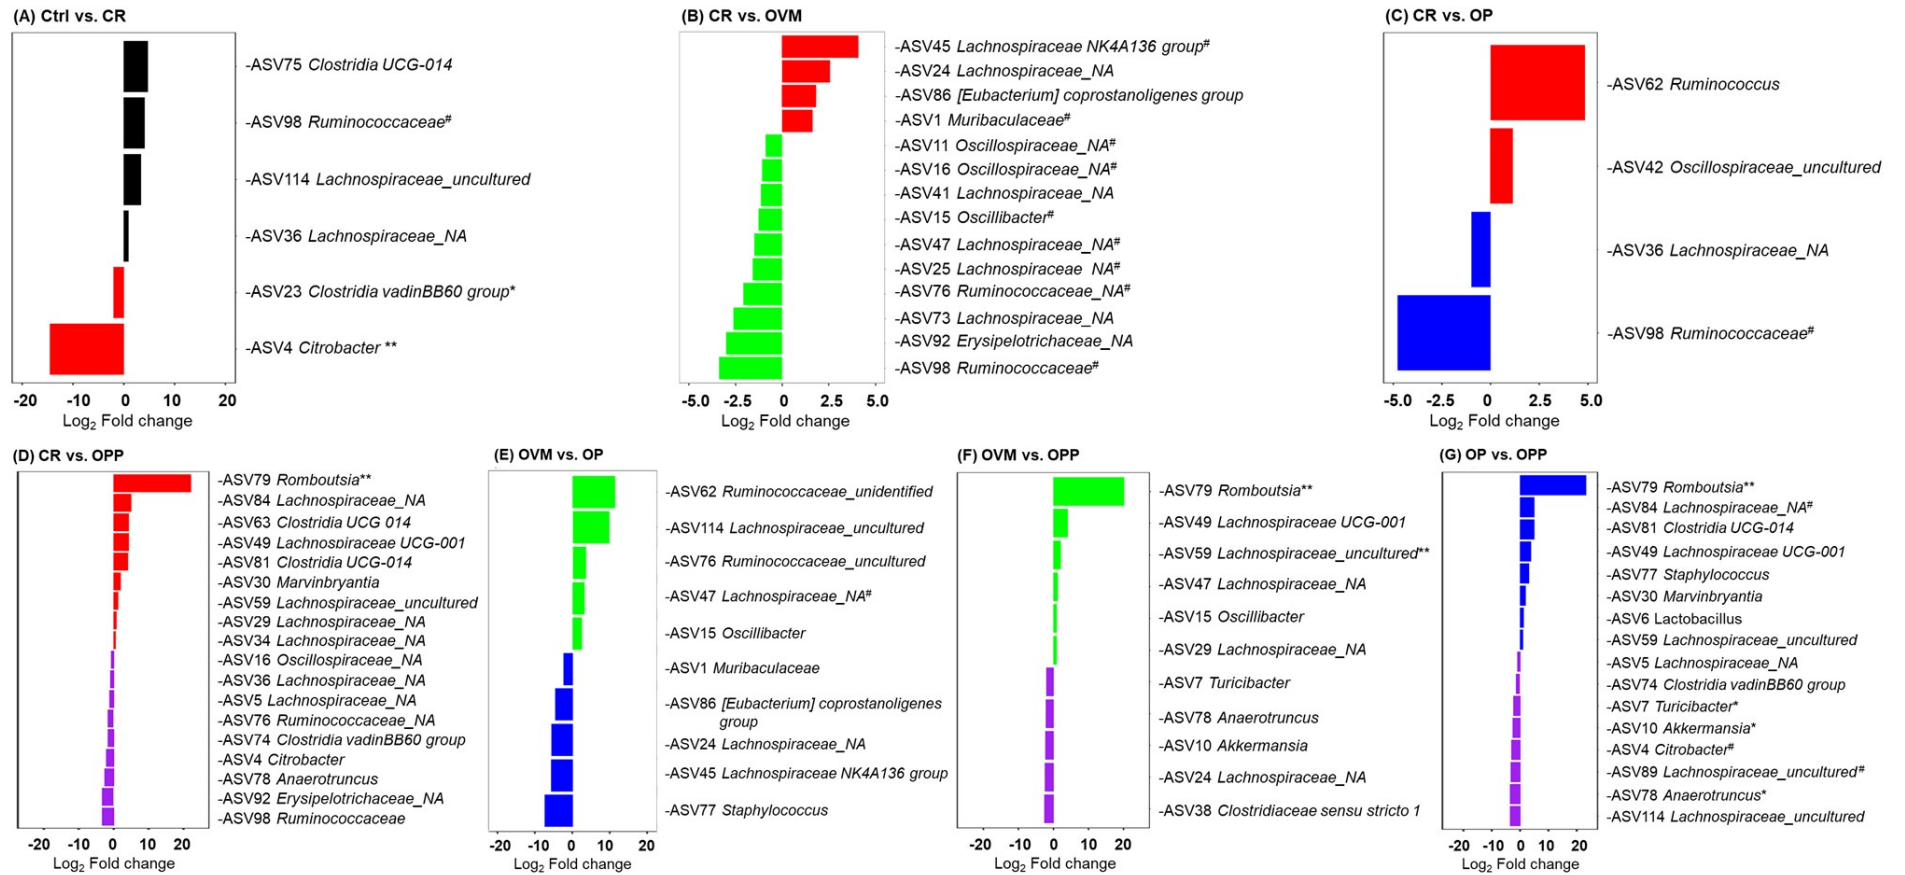

Fig. S4

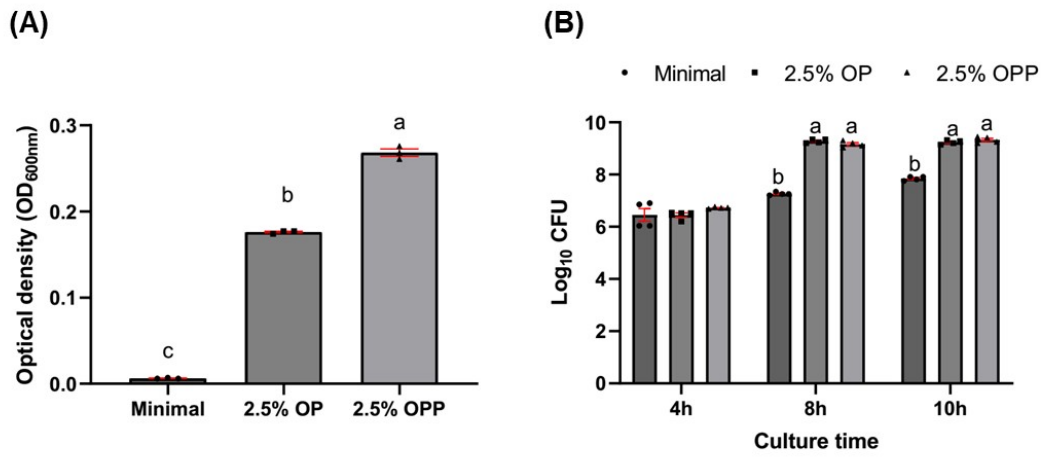

**Fig. S5**

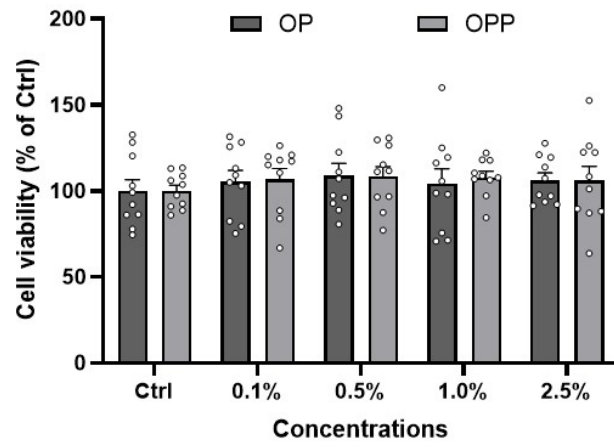

Fig. S6

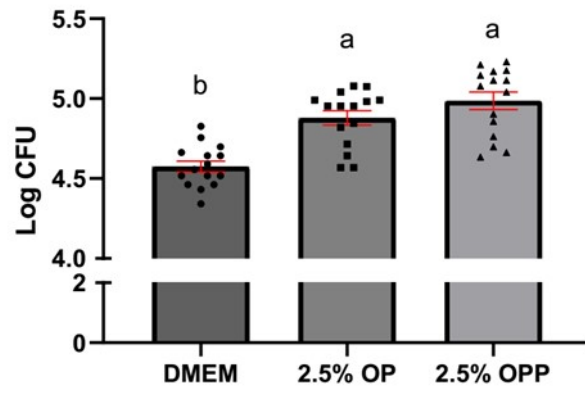



**Table S1**

| <b>Targeted gene</b> | <b>Oligonucleotide sequence (5'-3')</b>                          | <b>Reference</b> |
|----------------------|------------------------------------------------------------------|------------------|
| <i>EspB</i>          | Forward: ATGCCGCAGATGAGACAGTTG<br>Reverse: CGTCAGCAGCCTTTTCAGCTA | 1                |
| Total bacteria       | Forward: AA ACTCAA AKGAATTGACGG<br>Reverse: CTCACRRCACGAGCTGAC   | 2                |

## Reference

1. S. Sagaidak, A. Taibi, B. Wen and E. M. Comelli, Development of a real-time PCR assay for quantification of *Citrobacter rodentium*, *J. Microbiol. Methods*, 2016, **126**, 76-77.
2. T. B. De Gregoris, N. Aldred, A. S. Clare and J. G. Burgess, Improvement of phylum-and class-specific primers for real-time PCR quantification of bacterial taxa, *J. Microbiol. Methods*, 2011, **86**, 351-356.
